# Supplementary material
Source: Springer Nature journal article supplement (https://www.springermedizin.de/resource/supplementary/12885_2010_2617_MOESM2_ESM.pdf/9461582)

## OSA8

rhOncostatin M  
50ng/mL

0' 5' 10' 30'

pSTAT3

STAT3

pJAK2

JAK2

pSrc

Src

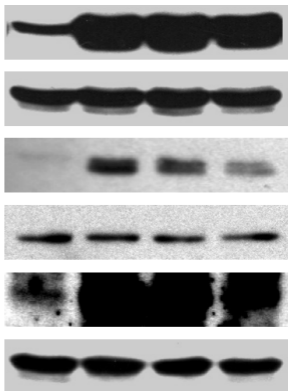

## SJSA

rhOncostatin M  
50ng/mL

0' 5' 10' 30'

pSTAT3

STAT3

pJAK2

JAK2

pSrc

Src

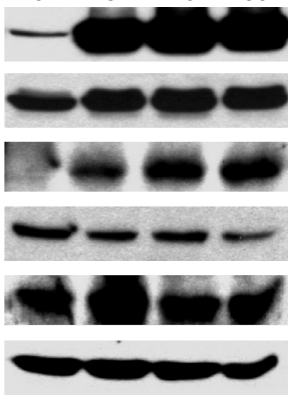

Supplement: MOESM2 [file 9461582]
